# Supplementary material for: Treatment benefit of upfront autologous stem cell transplantation for newly diagnosed multiple myeloma: a systematic review and meta-analysis
Source: Springer Nature journal article supplement (doi:10.1186/s12885-023-10907-1), 2023-05-16
Supplement: MOESM1 [file 25367950]

**Supplementary Table S1. Qualities of the RCT studies**

| Studies                | Multicenter | Randomization                                            | Drop Out After Randomization | Power (Predicted difference)                             | Estimated/Actual overall sample size              |
|------------------------|-------------|----------------------------------------------------------|------------------------------|----------------------------------------------------------|---------------------------------------------------|
| Palumbo et al, 2014    | Yes         | Stratified by age, ISS                                   | ASCT, 4.2%; No-ASCT, 12.1%   | 85% for 2-year PFS (ASCT HR 0.62)                        | 400/402 (129 discontinued before randomization)   |
| Gay et al, 2015        | Yes         | Stratified by age, ISS                                   | ASCT, 7.9%; No-ASCT, 17.8%   | 80% for 2-year PFS (ASCT HR 0.7)                         | 390/389 (133 discontinued before randomization)   |
| Attal et al, 2017      | Yes         | Stratified by ISS, FISH                                  | ASCT, 5%; No-ASCT, 8%        | 80% for $\geq$ 9-months PFS (ASCT 39, No-ASCT 30 months) | 700/700                                           |
| Cavo et al, 2020       | Yes         | Stratified by site, ISS                                  | ASCT, 19%; No-ASCT, 37.6%    | 80% for PFS (ASCT HR 0.78)                               | 1202/1354 (157 discontinued before randomization) |
| Gay et al, 2021        | Yes         | Stratified by age, ISS                                   | ASCT, 19%; No-ASCT, 28%      | 90% for $\geq$ VGPR (KRD: 80%; KCD:62%)                  | 477/477 (3 arms: KRD+ASCT, KRD, and KCD+ASCT)     |
| Richardson et al, 2022 | Yes         | Stratified by ISS, FISH                                  | ASCT, 20.8%; No-ASCT, 18.5%  | 90% for PFS (ASCT HR 0.7)                                | 722/720 (151 discontinued before randomization)   |
| Yong et al, 2023       | Yes         | Stratified by hospital, response to induction, ISS, FISH | ASCT, 4.6%; No-ASCT, 9.2%    | 80% for 2-year PFS (10% non-inferiority margin)          | 210/218 (63 discontinued before randomization)    |

*RCT, randomized controlled trial; ASCT, autologous stem-cell transplantation; FISH, fluorescence in situ hybridization; ISS, international Staging System; RVD, lenalidomide, bortezomib, and dexamethasone; KRD, carfilzomib, lenalidomide, and dexamethasone; KCD, carfilzomib, cyclophosphamide, and dexamethasone; PFS, progression-free survival; VGPR, very good partial response; HR, hazard ratio.*

**Supplementary Table S2. Qualities of the observational studies**

| Studies                   | Design           | Multicenter | Propensity score | Multivariate Regression | Immortal time bias adjustment | Missing values imputation |
|---------------------------|------------------|-------------|------------------|-------------------------|-------------------------------|---------------------------|
| Wildes et al, 2015        | Retrospective    | No          | Yes              | Yes                     | Nil                           | Yes                       |
| Biran et al, 2016         | Retrospective    | Yes         | Nil              | Yes                     | Yes                           | Nil                       |
| Cohen et al, 2018         | Retrospective    | Yes         | Nil              | Yes                     | Nil                           | Nil                       |
| Hajek et al, 2018         | Retrospective    | Yes         | Nil              | Nil                     | Nil                           | Nil                       |
| Remes et al, 2018         | Retrospective    | Yes         | Nil              | Nil                     | Nil                           | Nil                       |
| Rosenberg et al, 2019     | Retrospective    | Yes         | Yes              | Yes                     | Yes                           | Nil                       |
| Belotti et al, 2020       | Prospective; ITT | No          | Nil              | Yes                     | Nil                           | Nil                       |
| Czyż et al, 2020          | Retrospective    | Yes         | Nil              | Nil                     | Nil                           | Nil                       |
| Goldman-Mazur et al, 2020 | Retrospective    | Yes         | Nil              | Nil                     | Nil                           | Nil                       |
| Kaur et al, 2021          | Retrospective    | No          | Nil              | Yes                     | Nil                           | Nil                       |
| Lemieux et al, 2021       | Retrospective    | No          | Nil              | Yes (for PFS only)      | Nil                           | Nil                       |
| Abello et al, 2022        | Retrospective    | Yes         | Nil              | Nil                     | Nil                           | Nil                       |
| Bai et al, 2022           | Retrospective    | No          | Nil              | Nil                     | Nil                           | Nil                       |
| Cho et al, 2022           | Retrospective    | Yes         | Nil              | Yes                     | Nil                           | Nil                       |
| Pawlyn et al, 2022        | Retrospective    | Yes         | Yes              | Nil                     | Yes                           | Nil                       |

*ITT, intention-to-treat.*

**Supplementary Table S3. Main results of the observational studies before and after adjustment**

| Studies               | Outcome | Before adjustment         | Adjustment                                                                     | After adjustment           |
|-----------------------|---------|---------------------------|--------------------------------------------------------------------------------|----------------------------|
| Wildes et al, 2015    | OS      | ASCT HR: 0.54 (0.35~0.82) | Propensity score; Performance status; Comorbidity; Durie salmon stage          | ASCT HR: 0.52 (0.30~0.91)  |
| Biran et al, 2016     | OS      | ASCT HR: 0.8 (0.72~0.88)  | ASCT as time-varying covariate; Treatment; Age; ISS; ECOG                      | ASCT HR: 0.71 (0.48~1.04)  |
| Cohen et al, 2018     | PFS     | ASCT HR: 0.43 (0.23~0.79) | M spike level; ISS; Hb; LDH; Extramedullary disease; % of cells with del 17    | ASCT HR: 0.25 (0.056~0.54) |
|                       | OS      | ASCT HR: 0.19 (0.07~0.51) | Age; M spike level; ISS; Hb; LDH                                               | ASCT HR: 0.17 (0.02~0.59)  |
| Rosenberg et al, 2019 | OS      | NA                        | ASCT as time-varying covariate; Propensity score                               | ASCT HR: 0.70 (0.65~0.75)  |
| Belotti et al, 2020   | PFS     | ASCT HR: 0.42 (0.25~0.71) | Cytogenetics; ISS; IMWG frailty score                                          | ASCT HR: 0.91 (0.46~1.80)  |
| Kaur et al, 2021      | OS      | NA                        | Race; Age; IMWG risk classification; Sex; First-line response; Initial therapy | ASCT HR: 0.57 (0.38~0.87)  |
| Lemieux et al, 2021   | PFS     | ASCT HR: 0.69 (0.42~1.13) | Treatment response; HCT-CI; Cytogenetics; Use of maintenance                   | ASCT HR: 0.30 (0.15~0.63)  |
| Cho et al, 2022       | PFS     | NA                        | Age; ISS; Focal lesions                                                        | ASCT HR: 0.22 (0.12~0.43)  |
|                       | OS      | NA                        | ECOG; ISS; Focal lesions                                                       | ASCT HR: 0.53 (0.15~0.82)  |
| Pawlyn et al, 2022    | PFS     | NA                        | Propensity score                                                               | ASCT HR: 0.41 (0.34~0.48)  |
|                       | OS      | NA                        | Propensity score                                                               | ASCT HR: 0.51 (0.41~0.64)  |

ASCT, autologous stem-cell transplantation; CR, complete response; PFS, progression-free survival; OS, overall survival; OR, odds ratio; HR, hazard ratio; (95% confidence interval); HCT-CI, hematopoietic cell transplantation comorbidity index; IMWG, International Myeloma Working Group; ISS, International Staging System; ECOG, Eastern Cooperative Oncology Group performance status

**Supplementary Table S4. Main results of the observational studies before and after transformation**

| Studies                   | Outcome | Main results                                                                                                                               | Transformation                                |
|---------------------------|---------|--------------------------------------------------------------------------------------------------------------------------------------------|-----------------------------------------------|
| Hajek et al, 2018         | PFS     | Median (months) (ASCT vs. No-ASCT): 30.0 (27.7~32.3) vs. 11.6 (10.8~12.5). P<0.001                                                         | ASCT HR: 0.5 (0.46~0.55)                      |
|                           | OS      | Median (months) (ASCT vs. No-ASCT): Not reached vs. 34.6 (31.6~37.5). P<0.001                                                              | ASCT HR: 0.48 (0.42~0.54)                     |
| Remes et al, 2018         | PFS     | Median (months) (ASCT vs. No-ASCT): 33.9 (27.8~) vs. 12.6 (10.2~15.8). P<0.001                                                             | ASCT HR: 0.41 (0.30~0.56)                     |
|                           | OS      | Median (months) (ASCT vs. No-ASCT): Not reached vs. 46.2 (44~). P<0.001                                                                    | ASCT HR: 0.41 (0.26~0.66)                     |
| Lemieux et al, 2021       | PFS     | Median (months) (ASCT vs. No-ASCT): 41 vs. 33. P=0.03                                                                                      | ASCT HR: 0.69 (0.42~1.13) (before adjustment) |
|                           | OS      | 5-year OS (ASCT vs. No-ASCT): 73% vs. 83%. P=0.86                                                                                          | ASCT HR: 1.00 (0.29~3.47)                     |
| Goldman-Mazur et al, 2020 | PFS     | No difference. P=0.097                                                                                                                     | ASCT HR: 0.8 (0.61~1.04)                      |
|                           | OS      | Median (months) (ASCT vs. No-ASCT): 60.0 (47~101) vs. 37.9 (23.3~47). P<0.001                                                              | ASCT HR: 0.63 (0.46~0.87)                     |
| Bai et al, 2022           | OS      | 1 <sup>st</sup> , 2 <sup>nd</sup> and 3 <sup>rd</sup> year OS (%) (ASCT vs. No-ASCT): 96 vs. 70.59, 88 vs. 58.82, and 80 vs. 47.06. P<0.05 | ASCT HR: 0.40 (0.13~1.23)                     |

*ASCT, autologous stem-cell transplantation; CR, complete response; PFS, progression-free survival; OS, overall survival; OR, odds ratio; HR, hazard ratio; (95% confidence interval)*

**Supplementary Table S5. Trim and fill method for adjustment of publication bias**

| ASCT       | Egger's test | Original number of studies | Original effect size (95% CI) | Imputed number of studies | Imputed number of studies in the area of P>0.1 | Total number of studies after imputation | Effect size after imputation (95% CI) |
|------------|--------------|----------------------------|-------------------------------|---------------------------|------------------------------------------------|------------------------------------------|---------------------------------------|
| OR for CR  | 0.62         | 10                         | 1.24 (1.02~1.51)              | 1                         | 1                                              | 11                                       | 1.22 (1.001~1.49)                     |
| HR for PFS | 0.03         | 15                         | 0.53 (0.46~0.62)              | 2                         | 2                                              | 17                                       | 0.56 (0.48~0.66)                      |
| HR for OS  | 0.3          | 20                         | 0.58 (0.50~0.69)              | 1                         | 1                                              | 21                                       | 0.60 (0.51~0.70)                      |

*ASCT, autologous stem-cell transplantation; CR, complete response; PFS, progression-free survival; OS, overall survival; OR, odds ratio; HR, hazard ratio; CI, confidence interval*



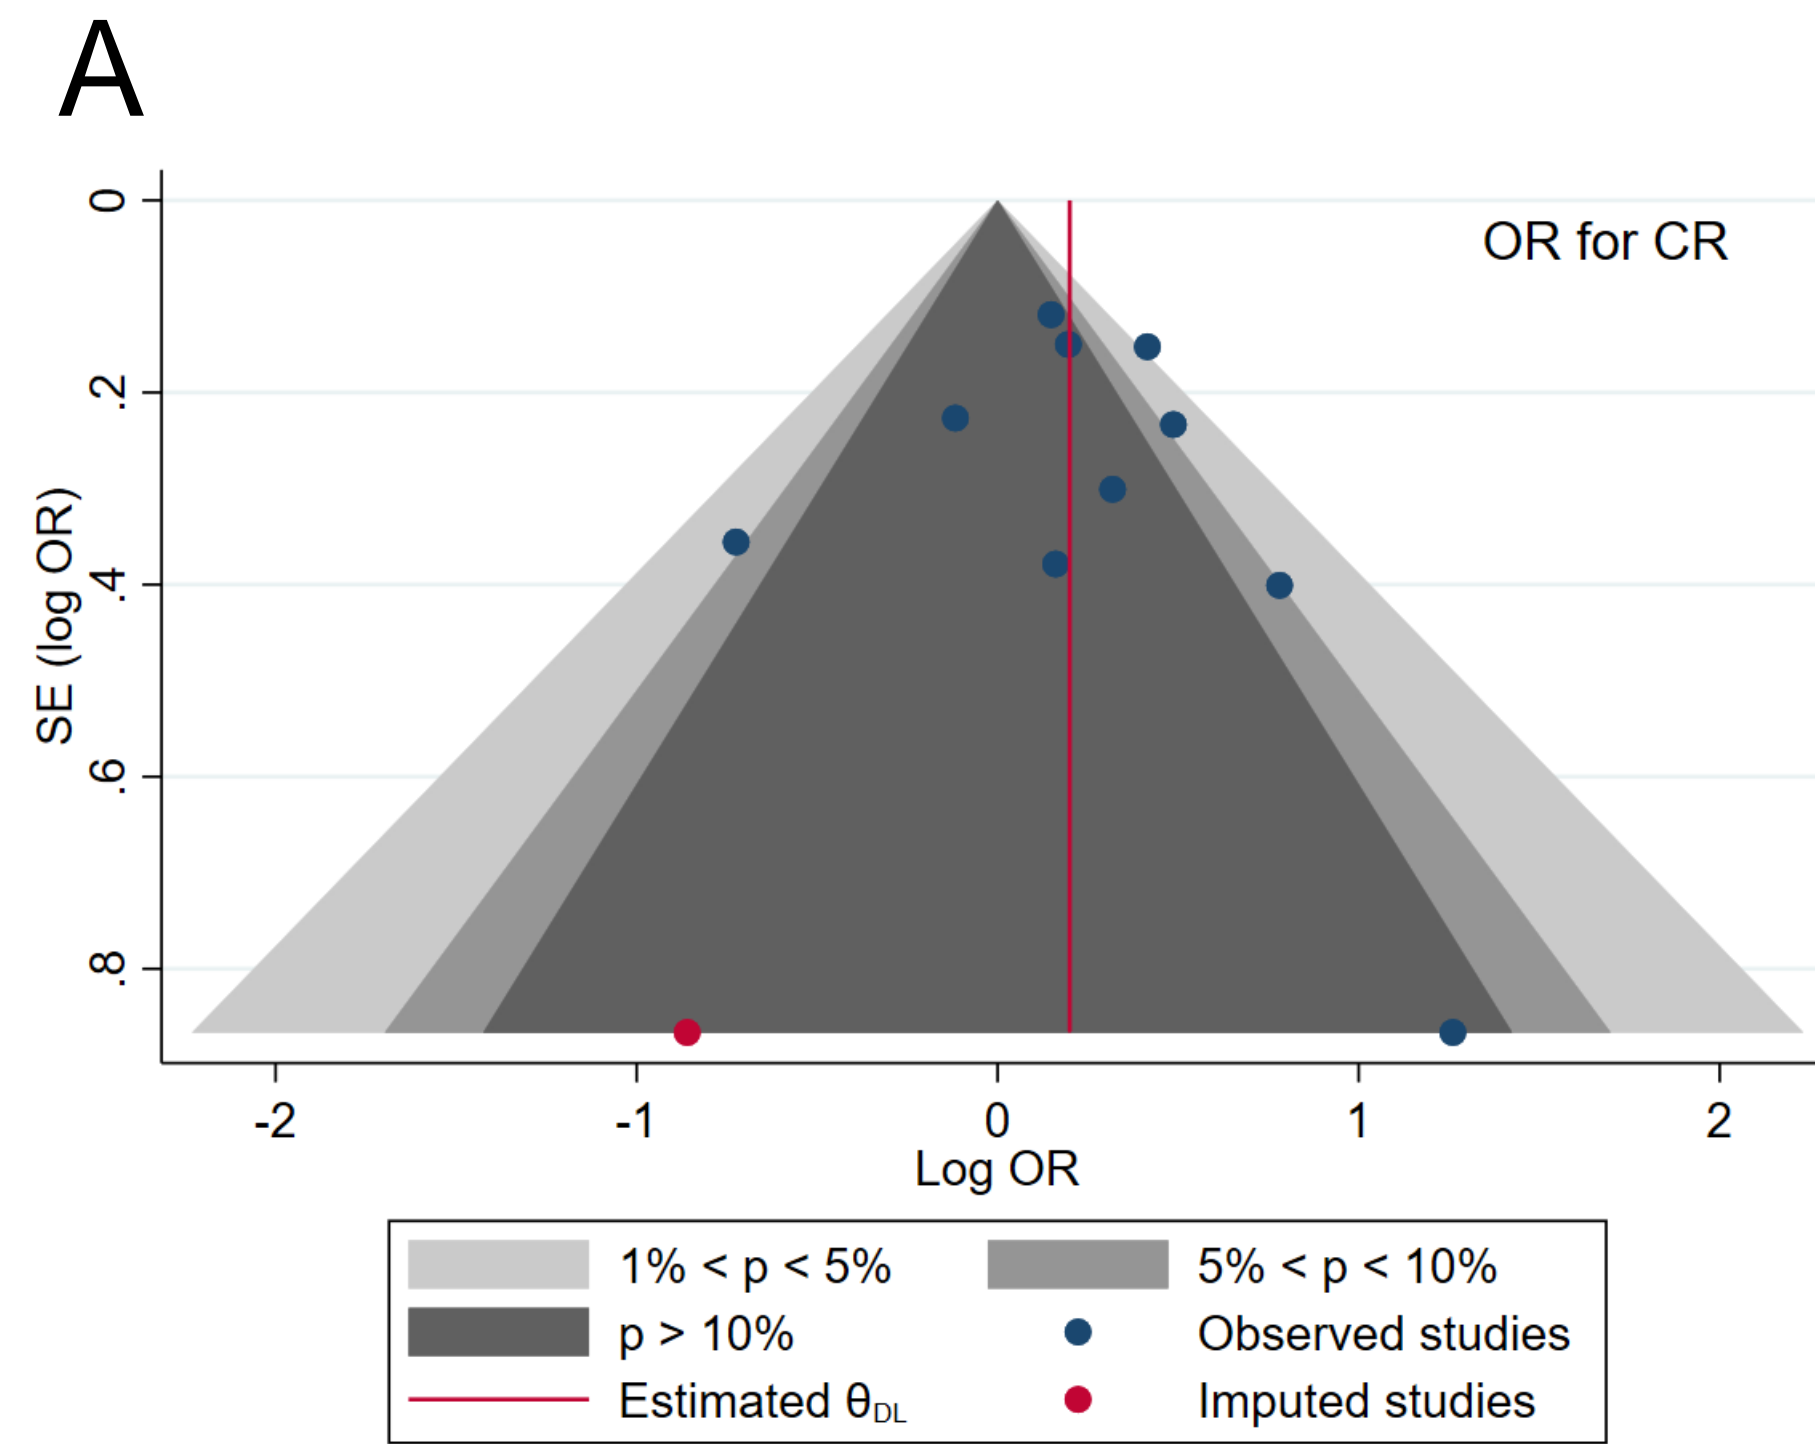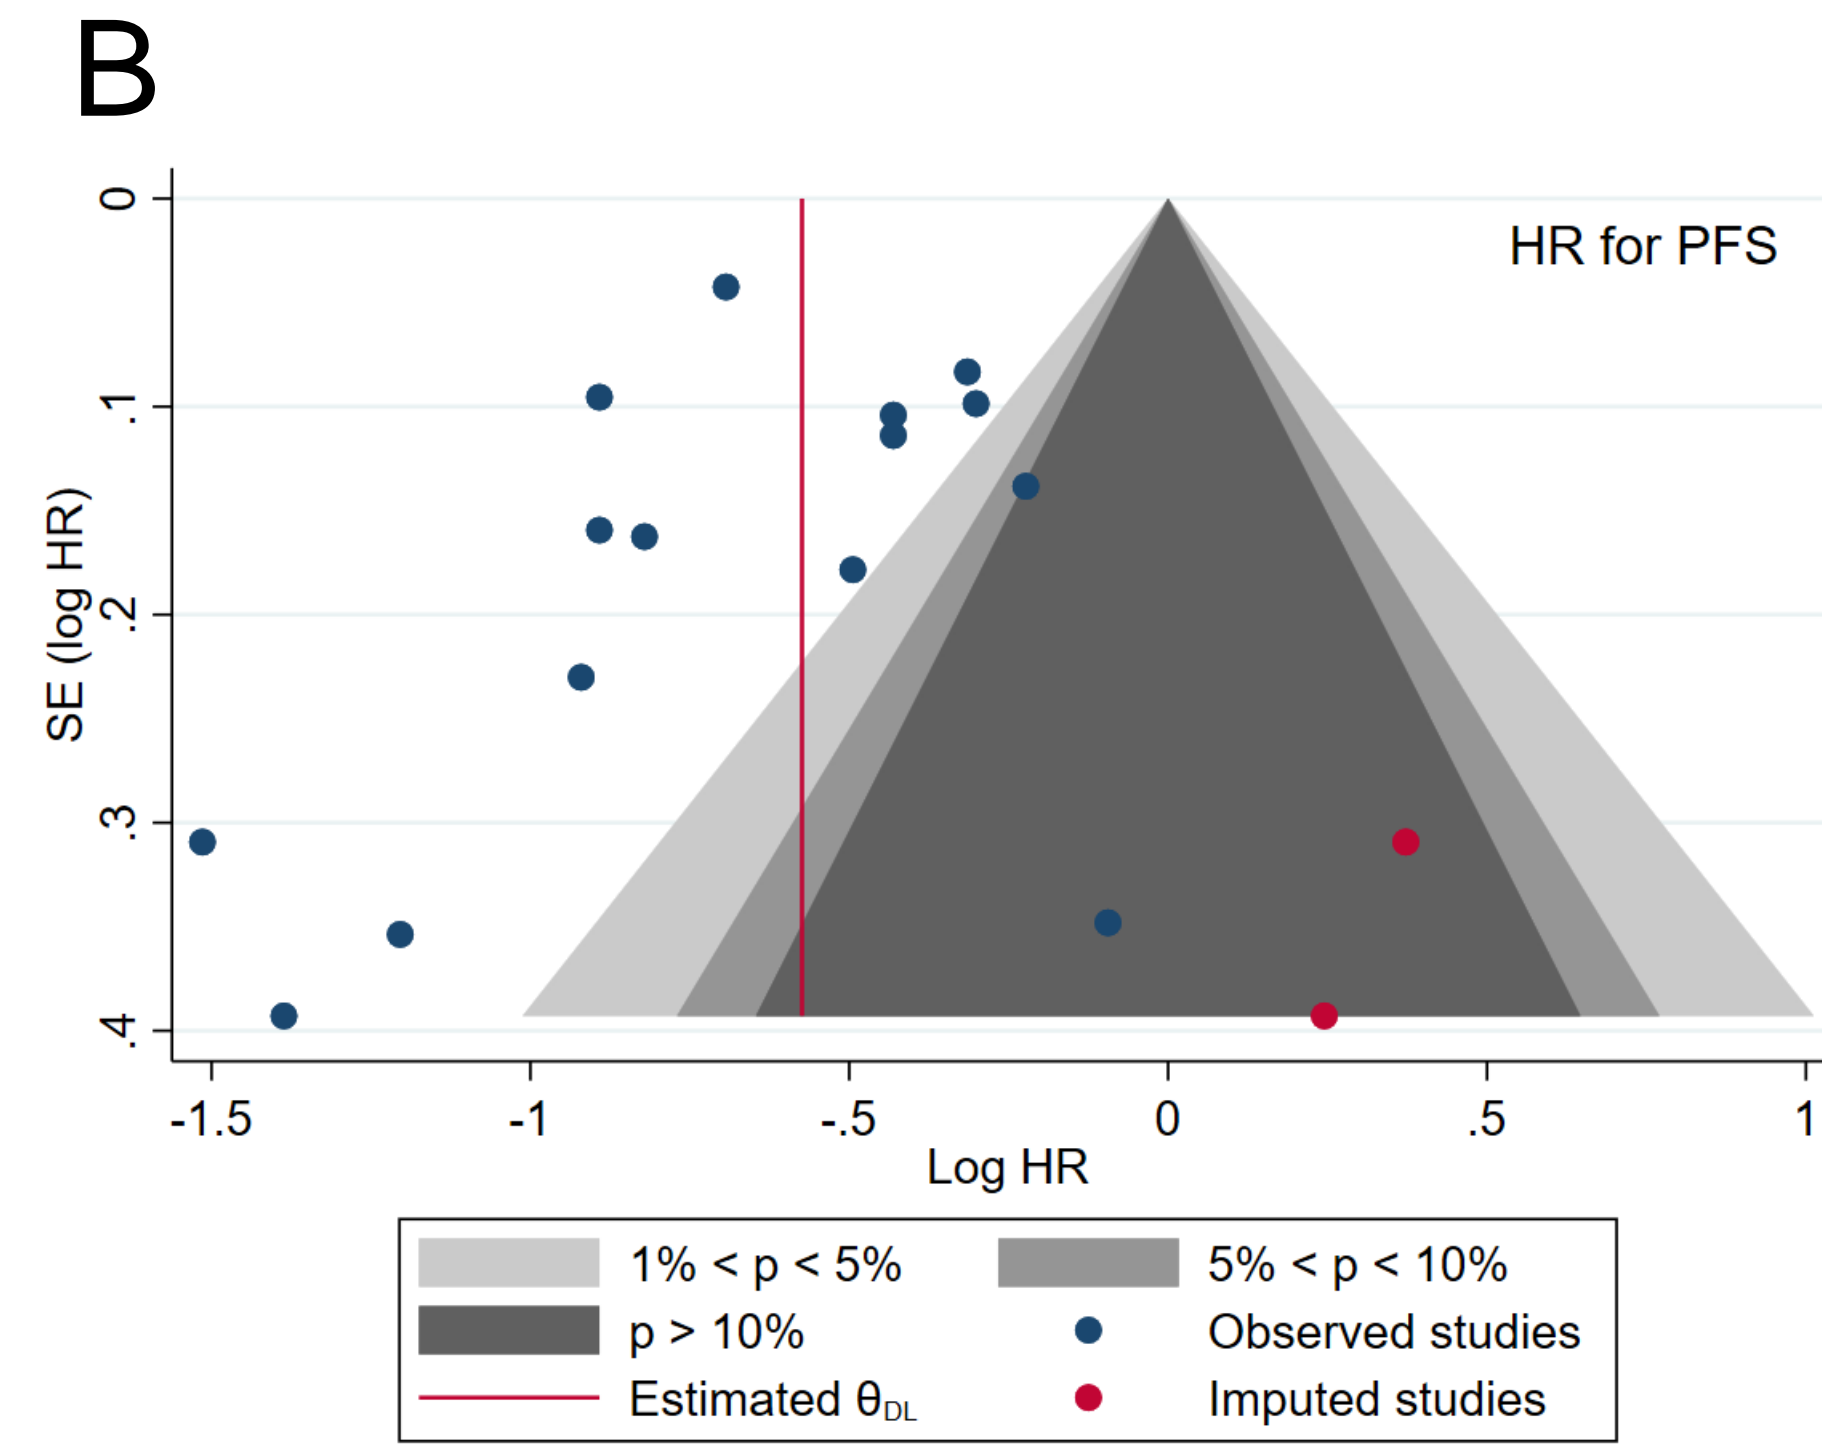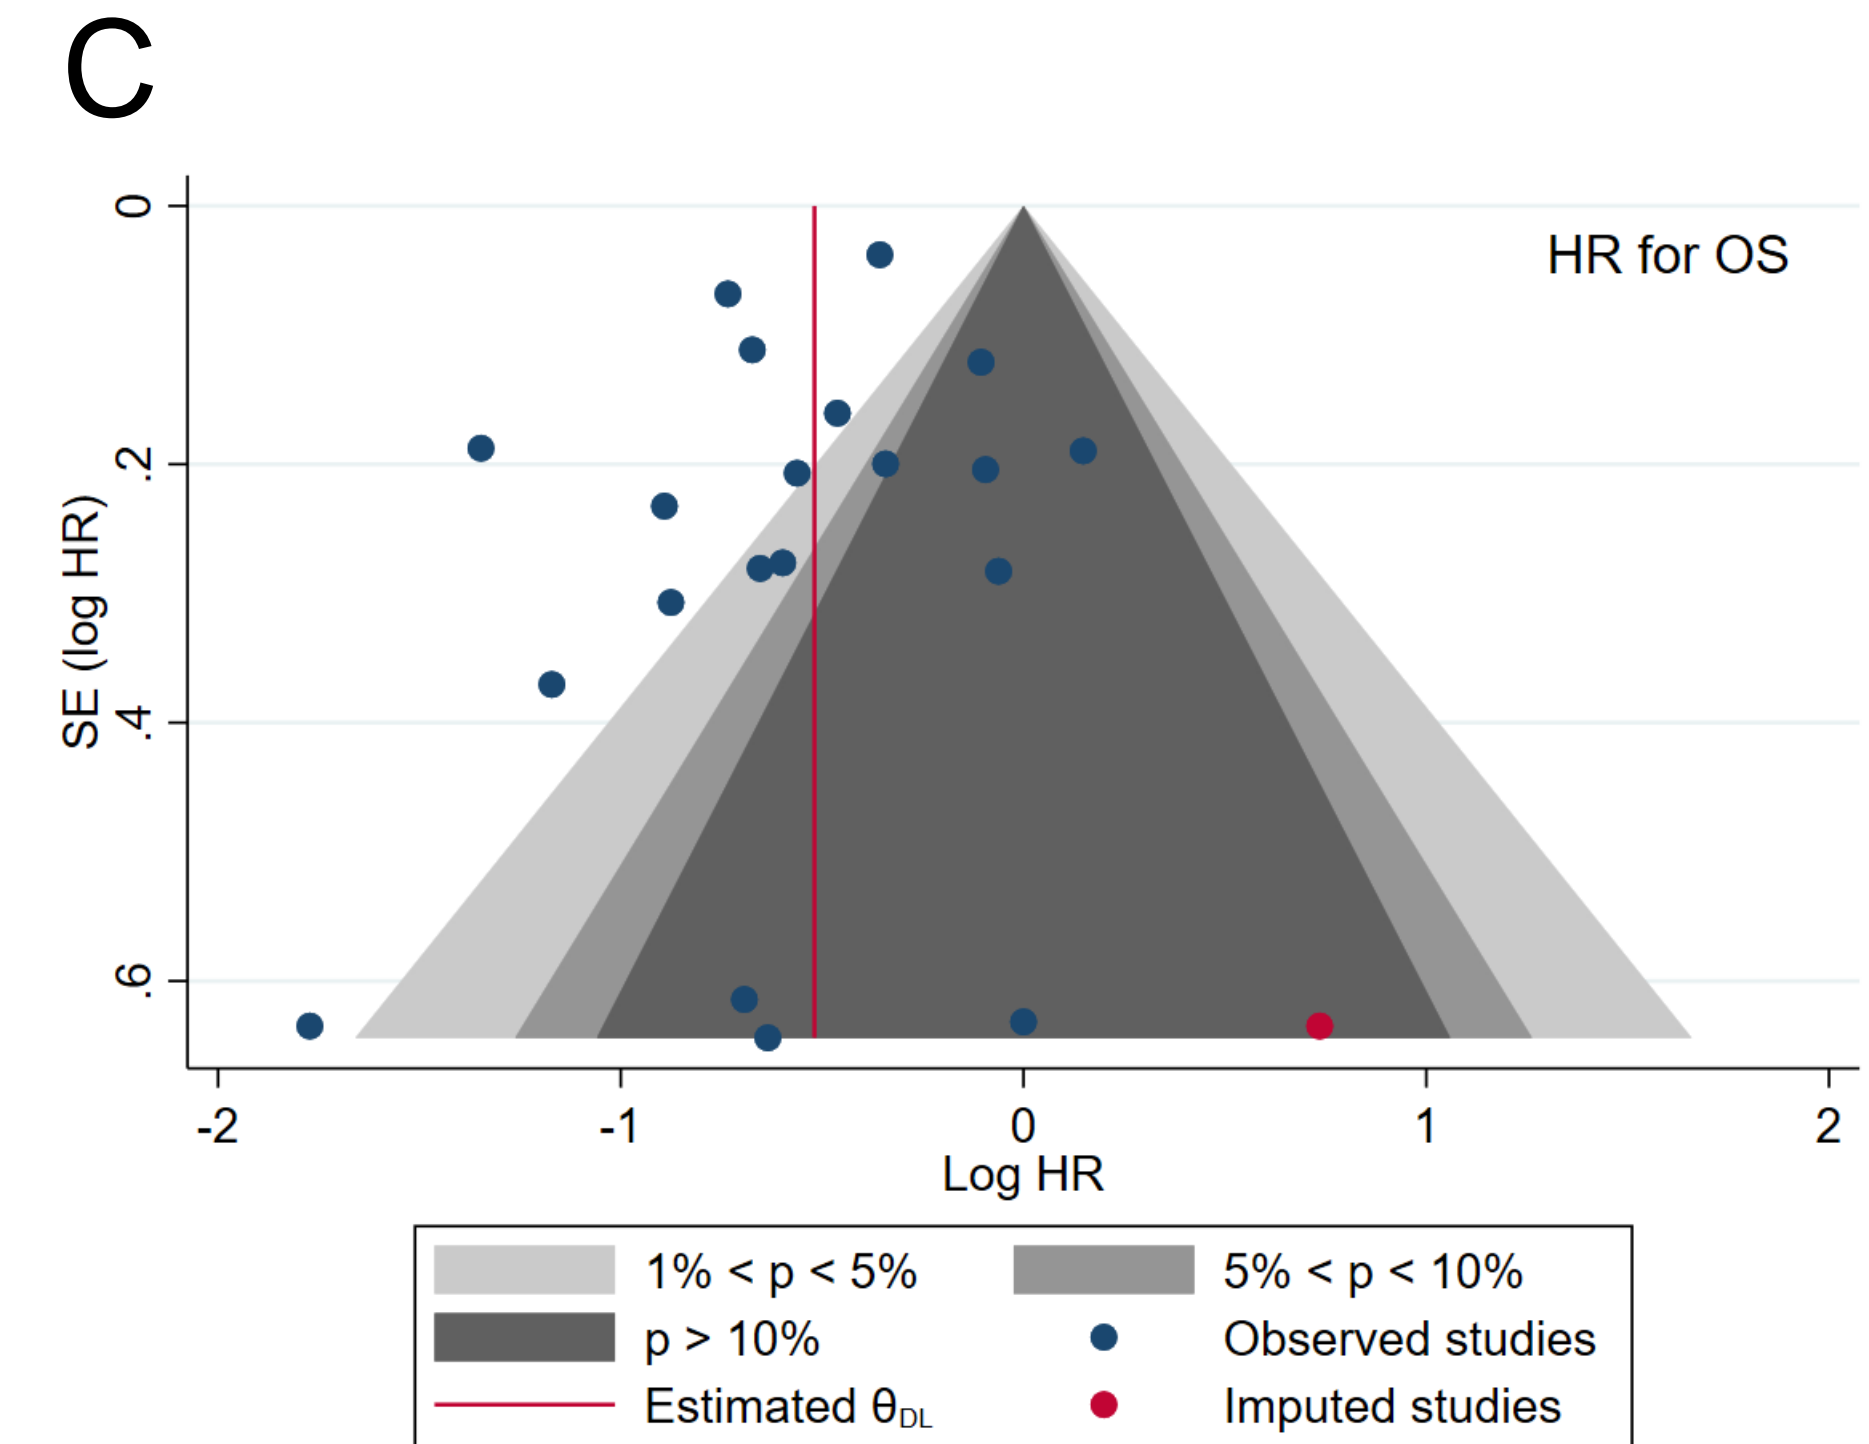

**Supplementary Figure S2.** Contour funnel plots of trim and fill method. A: OR for CR; B: HR for PFS; C: HR for OS; CR, complete response; OR, odds ratio; HR, hazard ratio; PFS, progression-free survival; OS, overall survival; SE, standard error.
